# Supplementary material
Source: Elsevier journal article supplement (https://www.sciencedirect.com/science/article/pii/S0300289620300417)
Supplement: mmc1 [file S0300289620300417:mmc1.doc]

**Material suplementario**

**Métodos**

Para la elaboración de estas normativas se han seguido los pasos que se detallan a continuación.

**Constitución del grupo de trabajo**

El grupo de trabajo estuvo constituido por especialistas en neumología, con una amplia representación geográfica. La coordinación del documento ha sido a cargo de Rosario Menéndez. Se ha contado con la participación de un metodólogo experto y un documentalista del Centro Cochrane Iberoamericano, que han asesorado en el desarrollo de las normativas y han efectuado la búsqueda sistemática de la literatura.

El documento se estructura en diferentes preguntas de relevancia para la práctica clínica, y los miembros del grupo elaborador se han dividido en grupos de trabajo según su área de interés. Todos los miembros del grupo de trabajo han revisado y aprobado esta actualización de las normativas de neumonía intrahospitalaria (NIH) y neumonía asociada al ventilador (NAV) en su conjunto.

**Formulación de preguntas clínicas**

Los miembros del grupo de trabajo priorizaron un total de 6 preguntas clínicas que esta actualización de las normativas debía contestar:

1. ¿Son similares la epidemiología y microbiología de la NIH y de la NAV?
2. ¿Son válidos los factores de riesgo para predecir la etiología de la NIH y la NAV causada por microorganismos multirresistentes (MDR) y extremadamente resistentes (XDR) a los antibióticos?
3. ¿Son efectivos los biomarcadores para el diagnóstico y la duración del tratamiento?
4. ¿Cuál es el algoritmo de tratamiento empírico actual para la NIH y la NAV?
5. ¿Influye la duración del tratamiento antibiótico de 7-8 días vs. 14 días, en el desenlace de los pacientes?
6. ¿Cuál es la indicación más adecuada de los nuevos antibióticos?

**Búsqueda bibliográfica**

Con la ayuda de un documentalista, se diseñó una estrategia de búsqueda de la literatura médica para identificar, en primer lugar, revisiones sistemáticas posteriores a la fecha de publicación de una reciente guía de práctica clínica sobre NIH1 y posteriormente ensayos clínicos aleatorizados o estudios observacionales o de diagnóstico según la pregunta clínica.

La búsqueda se realizó en MEDLINE (vía PubMed) desde septiembre de 2016 hasta noviembre de 2018. No se estableció ningún límite por idioma de publicación y para identificar los distintos tipos de diseños (revisiones sistemáticas y ensayos clínicos) se utilizaron filtros metodológicos validados.

La búsqueda identificó un total de 885 referencias bibliográficas de las cuales 70 eran revisiones sistemáticas, 98 ensayos clínicos y los restantes 717 documentos correspondían a estudios de otros tipos de diseño. Los distintos grupos de trabajo recibieron estas referencias y seleccionaron los estudios de interés para cada pregunta clínica en base al título y el resumen, y posteriormente se obtuvieron los artículos a texto completo. No se consideraron como referencia estudios publicados únicamente como resúmenes.

**Estructura del documento**

Para cada pregunta clínica, estas normativas presentan la controversia actual que incluye las recomendaciones SEPAR anteriores publicadas en el año 20112 y otras guías de práctica clínica relevantes, un resumen de los principales de los principales hallazgos de la evidencia más actual, las directrices propuestas y donde no existe una evidencia definitiva, se han propuesto los estudios necesarios para resolver estas lagunas de evidencia.

Estas normativas no han evaluado la calidad de la evidencia y tampoco han realizado una clasificación formal de la fuerza de las recomendaciones. La decisión final sobre las directrices presentadas fue tomada a partir de la discusión entre los miembros del grupo de trabajo y con el objetivo de que fueran útiles en la toma de decisiones clínicas diarias.

Estrategia de búsqueda

| ((((Pneumonia [mh]) OR Pneumon* [tw])) AND ((((Respiration, Artificial [mh:noexp]) OR Ventilators, Mechanical [mh]) OR Cross Infection [mh]) OR (respirat*[tw] OR ventilat*[tw]))) AND ((((Pneumonia, Ventilator-Associated [mh:noexp]) OR (Vap [tw] OR HAP [tw])) OR (Nosocomial pneumonia [tw] OR Hospital Acquired Pneumonia[tw])) OR Health care associated pneumonia [tw])Sort by: PublicationDate Filters: Publication date from 2016/09/01 | 885 (desde septiembre 2016) |
| --- | --- |
| (systematic review[tiab] OR Meta-Analysis[pt] OR Meta-Analysis as Topic[mh] OR Meta-Analys*[tiab] OR "Cochrane Database Syst Rev"[Journal:__jrid21711]) | Filtro de revisions sistemáticas |
| ((randomized controlled trial[pt] OR controlled clinical trial[pt] OR placebo[tiab] OR clinical trials as topic[mesh: noexp] OR randomly[tiab] OR trial[ti]) NOT (animals [mh] NOT humans [mh])) | Filtro de ensayos clínicos |

**Conflictos de interés**

Tanto los coordinadores como todos los miembros del grupo de trabajo han hecho una declaración de todas las relaciones con la industria que pudieran representar un potencial conflicto de interés al inicio del proyecto y antes de la publicación del mismo.

**Resultados**

**Tabla 1. Componentes individuales del paquete de prevención de la neumonía asociada al ventilador.**

| **7 medidas basicas** | **3 medidas altamente recomendables** |
| --- | --- |
| Educación y entrenamiento en manejo apropiado de la vía aérea | Descontaminación selectiva del tracto digestivo u orofaringe |
| Estricta higiene de manos con solución alcohólica antes de la manipulación de la vía aérea | Aspiración de secreciones subgloticas continua |
| Control y mantenimiento de del neumotaponamiento | Cursos cortos de antibióticos durante la intubación de pacientes con alteración del estado de conciencia |
| Higiene bucal |  |
| Posición semi incorporada |  |
| Promover protocolos que acorten la duración de la ventilación mecanica |  |
| Evitar cambios rutinarios de circuitos, humidificadores y tubos endotraqueales |  |

**Tabla 2.** Características de los principales estudios aleatorizados y controlados que han evaluado el uso de la concentración sérica de procalcitonina (PCT) como guía de la duración del tratamiento antibiótico en pacientes con neumonía asociada al ventilador (NAV) ingresados en la unidad de cuidados intensivos (UCI) o con infecciones respiratorias

| Autor, año  referencia | Pacientes | Diferencias en la duración del tratamiento PCT versus control | Diferencias en mortalidad y otros desenlaces |
| --- | --- | --- | --- |
| Stolz, 20093 | Pacientes con NAV | Mayor mediana (RIQ) de días libres de antibióticos dentro de los 28 días del diagnóstico de NAV en el grupo PCT que en el control (13 [2-21] versus 9,5 [1,5-17]). Reducción en la duración total del tratamiento antibiótico del 27% en el grupo PCT | Sin diferencia significativa en eventos secundarios o cambios fisiológicos observados desde el día 1 al día 28 |
| Bouadma, 20104 | Pacientes ingresado en UCI | La media de duración del tratamiento antibiótico fue menor en el grupo de PCT que en el control (14,3 días versus 11,6 días; diferencia absoluta 2,7 días). Los días libres de antibióticos en pacientes NAV fueron menores en el grupo PCT (9,7 versus 12,8 (diferencia absoluta 3,1, IC 95% 0,7-5,6) | La diferencia en la mortalidad a los 60 días no fue significativa (30% versus 26,1%; diferencia 3,8%, IC 95% -2,1 a 9,7) |
| de Jong, 20165 | Pacientes ingresados en UCI | Mediana de días libres de antibióticos en los 28 días siguientes a la aleatorización: 7,0 grupo PCT versus 5,0 grupo control (diferencia absoluta 3,1 días) | A los 28 días de la aleatorización, mortalidad 20% grupo PCT versus 25% grupo control (diferencia absoluta 5,3%, IC 95% 1,2-9,5, *P* = 0,012) |
| Wongsurakiat, 20186 | Pacientes con NAV por bacilos Gram negativos y respuesta adecuada al día 7 | Grupo de PCT hubo un mayor número de días libres de antibióticos en los 28 días después del inicio NAV que el control (media 14,6 ± 5,4 versus 5,9 ± 5,7 días, *P* < 0.001) | Sin diferencia en los eventos secundarios descritos |
| Huang, 20187 | Pacientes con infecciones respiratorias de vías bajas | Sin diferencias significativas en días de tratamiento antibiótico entre grupos de PCT y control (4,2 versus 4,3 días, diferencia -0,05 días, IC 95% -0,6 a 0,5, *P* = 0,87) | Los resultados adversos en los primeros 30 días fueron similares (grupo PCT 11,7%, grupo control 13,1%, diferencia -1,5%, IC 95% -4,6 a 1,7, *P* < 0,001 para no inferioridad) |

IC: intervalo de confianza.

**Bibliografía**

1. Torres A, Niederman MS, Chastre J, Ewig S, Fernandez-Vandellos P, Hanberger H, et al. International ERS/ESICM/ESCMID/ALAT guidelines for the management of hospital-acquired pneumonia and ventilator-associated pneumonia: Guidelines for the management of hospital-acquired pneumonia (HAP)/ventilator-associated pneumonia (VAP) of the European Respiratory Society (ERS), European Society of Intensive Care Medicine (ESICM), European Society of Clinical Microbiology and Infectious Diseases (ESCMID) and Asociación Latinoamericana del Tórax (ALAT). Eur Respir J 2017;50(3). pii: 1700582. doi: 10.1183/13993003.00582-2017.
2. Blanquer J, Aspa J, Anzueto A, Ferrer M, Gallego M, Rajas O, et al. Normativa SEPAR: neumonía nosocomial. Arch Bronconeumol 2011;47:510-520.
3. Stolz D, Smyrnios N, Eggimann P, Pargger H, Thakkar N, Siegemund M, et al. Procalcitonin for reduced antibiotic exposure in ventilator-associated pneumonia: a randomised study. Eur Respir J 2009;34:1364-1375.
4. Bouadma L, Luyt CE, Tubach F, Cracco C, Alvarez A, Schwebel C, et al. Use of procalcitonin to reduce patients' exposure to antibiotics in intensive care units (PRORATA trial): a multicentre randomised controlled trial. Lancet 2010;375:463-474.
5. de Jong E, van Oers JA, Beishuizen A, Vos P, Vermeijden WJ, Haas LE, et al. Efficacy and safety of procalcitonin guidance in reducing the duration of antibiotic treatment in critically ill patients: a randomised, controlled, open-label trial. Lancet Infect Dis 2016;16:819-827.
6. Wongsurakiat P, Tulatamakit S. Clinical pulmonary infection score and a spot serum procalcitonin level to guide discontinuation of antibiotics in ventilator-associated pneumonia: a study in a single institution with high prevalence of nonfermentative gram-negative bacilli infection. Ther Adv Respir Dis 2018; 12:1753466618760134. doi: 10.1177/1753466618760134.
7. Huang DT, Yealy DM, Filbin MR, Brown AM, Chang CH, Doi Y, et al. Procalcitonin-guided use of antibiotics for lower respiratory tract infection. N Engl J Med 2018;379:236-249.
